# THE AMERICAN JOURNAL OF PSYCHIATRY

---

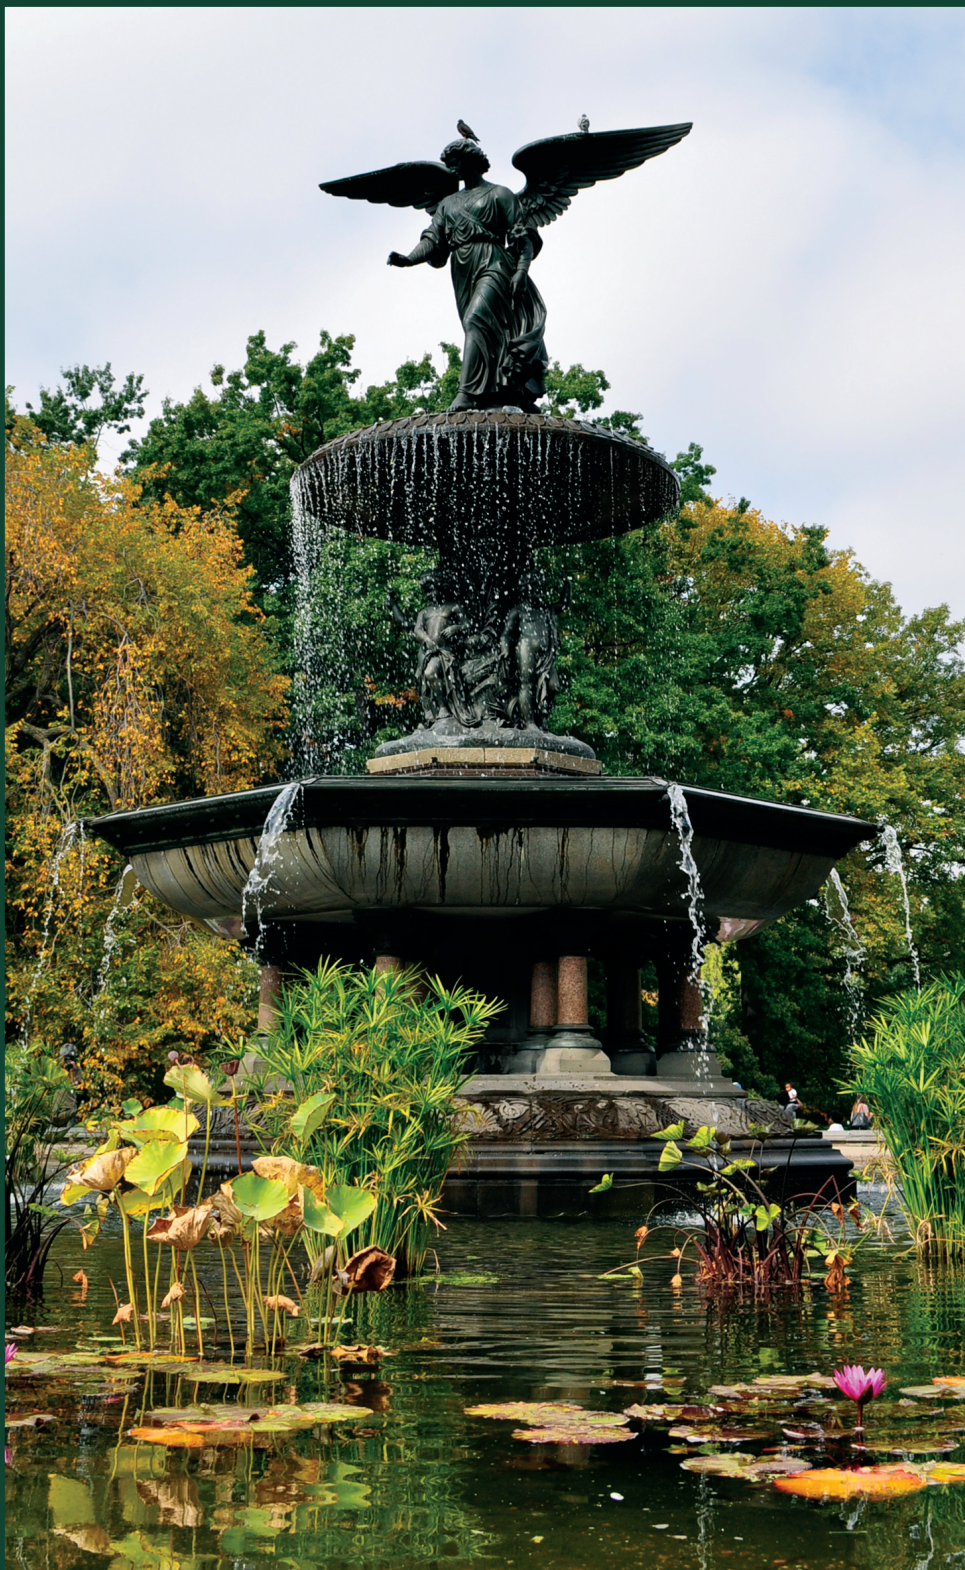

**Psychological Interventions for  
Psychosis: A Meta-Analysis of  
Comparative Outcome Studies**

David Trevor Turner, M.Sc.,  
M.Sc.Res., et al.

523

**Intrinsic Hippocampal Activity  
as a Biomarker for Cognition  
and Symptoms in Schizophrenia**

Jason R. Tregellas, Ph.D., et al.

549

**Serological Documentation of  
Maternal Influenza Exposure  
and Bipolar Disorder in Adult  
Offspring**

Sarah E. Canetta, Ph.D., et al.

557

**Structural Brain Development  
and Depression Onset During  
Adolescence: A Prospective  
Longitudinal Study**

Sarah Whittle, Ph.D., et al.

564

**May 2014**

**Volume 171 • Number 5**

---

Official Journal of the  
AMERICAN PSYCHIATRIC ASSOCIATION

---

[ajp.psychiatryonline.org](http://ajp.psychiatryonline.org)
