# THE AMERICAN PSYCHIATRIC ASSOCIATION

1000 Wilson Blvd., Suite 1825, Arlington, VA 22209-3901  
(888) 357-7924 (toll-free inside the U.S. and Canada) / (703) 907-7300  
web site: [www.psychiatry.org](http://www.psychiatry.org) • e-mail: [apa@psych.org](mailto:apa@psych.org)

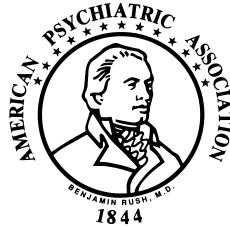

## OFFICERS 2013–2014

|                 |                            |
|-----------------|----------------------------|
| President       | Jeffrey A. Lieberman, M.D. |
| President-Elect | Paul Summergrad, M.D.      |
| Treasurer       | David Fassler, M.D.        |
| Secretary       | Maria A. Oquendo, M.D.     |

## ASSEMBLY

|               |                        |
|---------------|------------------------|
| Speaker       | Melinda L. Young, M.D. |
| Speaker-Elect | Jenny L. Boyer, M.D.   |
| Recorder      | Glenn A. Martin, M.D.  |

## MEDICAL DIRECTOR'S OFFICE

Medical Director and CEO    Saul Levin, M.D., M.P.A.

## BOARD OF TRUSTEES

|                              |                         |                             |
|------------------------------|-------------------------|-----------------------------|
| Jeffrey Akaka, M.D.          | Jeffrey Geller, M.D.    | Phillip M. Murray, M.D.     |
| Christina J. Arredondo, M.D. | Marc David Graff, M.D.  | James E. Nining, M.D.       |
| Carol A. Bernstein, M.D.     | James A. Greene, M.D.   | John M. Oldham, M.D.        |
| Lara J. Cox, M.D., M.S.      | Dilip V. Jeste, M.D.    | Uyen-Khanh Quang-Dang, M.D. |
| Brian Crowley, M.D.          | Judith F. Kashtan, M.D. | Gail E. Robinson, M.D.      |
| Anita S. Everett, M.D.       | Molly K. McVoy, M.D.    | Erik R. Vanderlip, M.D.     |

## PUBLISHER

Rebecca D. Rinehart

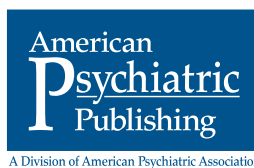

# THE AMERICAN PSYCHIATRIC ASSOCIATION

## Chairpersons of Councils, Commissions, Committees, and Task Forces

### Standing Committees

---

**Bylaws**

Rebecca W. Brendel, M.D., J.D.

**Elections**

Barry K. Herman, M.D.

**Ethics**

Richard D. Milone, M.D.

**Finance and Budget**

Alan F. Schatzberg, M.D.

**Audit**

David Fassler, M.D.

**Investment Oversight**

Larry R. Faulkner, M.D.

**Joint Reference**

Paul Summergrad, M.D.

**Membership**

Jonathan M. Amiel, M.D.

**Nominating**

Dilip V. Jeste, M.D.

**Tellers**

Hind Benjelloun, M.D.

### Council on Addiction Psychiatry

---

Frances R. Levin, M.D.

### Council on Advocacy and Government Relations

---

Robert Paul Cabaj, M.D.

**Advocacy and Litigation Funding**

Renee L. Binder, M.D.

### Council on Children, Adolescents, and Their Families

---

Louis J. Kraus, M.D.

**Agnes Purcell McGavin Award**

Christopher J. McDougle, M.D.

**Blanche F. Ittleson Research Award**

Matthew W. State, M.D.

### Council on Communications

---

Jeffrey A. Borenstein, M.D.

### Council on Geriatric Psychiatry

---

Robert P. Roca, M.D.

### Council on Healthcare Systems and Financing

---

Harsh K. Trivedi, M.D.

**Reimbursement for Psychiatric Care**

Bruce J. Schwartz, M.D.

**RBRVS, Codes and Reimbursement**

Ronald M. Burd, M.D.

### Council on Medical Education and Lifelong Learning

---

Richard F. Summers, M.D.

**APA Public Psychiatry Fellowship Selection Committee**

Christina V. Mangurian, M.D.

**APA/SAMHSA Minority Fellowship Selection and Advisory**

Altha J. Stewart, M.D.

**Scientific Program**

Philip R. Muskin, M.D.

**Scientific Program Committee of the Institute on Psychiatric Services**

Hunter L. McQuiston, M.D.

**Task Force to Update the Ethics Annotations**

Laura W. Roberts, M.D.

**Vestermark Award Committee**

Joel Yager, M.D.

### Council on Minority Health and Health Disparities

---

Sandra C. Walker, M.D.

### Council on Psychiatry And Law

---

Steven K. Hoge, M.D.

**Isaac Ray/Human Rights Award**

Steven K. Hoge, M.D.

**Judicial Action**

Paul S. Appelbaum, M.D.

**Manfred S. Guttmacher Award**

David A. Lowenthal, M.D.

### Council on Psychosomatic Medicine (Consultation Liaison Psychiatry)

---

Joel E. Dimsdale, M.D.

### Council on Quality Care

---

Joel Yager, M.D.

**Mental Health Information Technology**

Steven Roy Daviss, M.D.

**Steering Committee on Practice Guidelines**

Michael J. Vergare, M.D.

### Council on Research

---

Dwight L. Evans, M.D.

**Psychiatric Dimensions of Disasters**

Charles R. Marmar, M.D.

**Research Awards**

Timothy B. Walsh, M.D.

**Task Force to Revise the Practice of Electroconvulsive Therapy**

Sarah H. Lisanby, M.D.

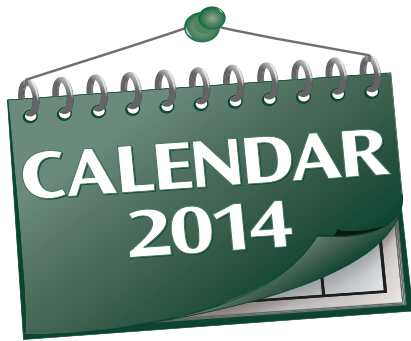

For free listing of your organization's official annual or regional meeting, please send us the following information: sponsor, location, inclusive dates, type and number of continuing education credits (if available), and the name, address, and telephone number of the person or group to contact for more information. In order for an event to appear in our listing, all notices and changes must be received at least 6 months in advance of the meeting and should be addressed to:

**Calendar, American Journal of Psychiatry, 1000 Wilson Boulevard, Suite 1825, Arlington, VA 22209-3901, [swestrate@psych.org](mailto:swestrate@psych.org) (e-mail).**

Because of space limitations, only listings of meetings of the greatest interest to Journal readers may be included.

## MAY

**May 1–3**, 58th Annual Meeting, American Academy of Psychoanalysis and Dynamic Psychiatry, Crowne Plaza Times Square, New York, New York. Contact: [info@AAPDP.org](mailto:info@AAPDP.org) (e-mail), [www.AAPDP.org](http://www.AAPDP.org) (web site).

**May 3–7**, 167th Annual Meeting, American Psychiatric Association, New York, NY. Contact: APA Annual Meetings Dept., 1000 Wilson Blvd, Suite 1825, Arlington, VA 22209; (703) 907-7815 (tel); <http://www.psych.org/learn/annual-meeting> (web site).

## JULY

**July 8–13**, 28th International Congress of Applied Psychology, Palais

de Congrès de Paris, France. Contact [exh@icap2014.com](mailto:exh@icap2014.com) (e-mail), [www.icap2014.com](http://www.icap2014.com) (web site).

**July 30–August 1**, 39th Annual University of Colorado Psychiatry Conference, The Gant, Aspen, featuring Glenn Gabbard, M.D., and John Gunderson, M.D., *Good Psychiatric Management*. Contact: Joelynn Jewell, [Joelynn.Jewell@ucdenver.edu](mailto:Joelynn.Jewell@ucdenver.edu) (e-mail), (303) 724 7401 (tel) for information and brochure.

## AUGUST

**August 21–23**, 6th International Conference on Schizophrenia VI (IConS VI), Chennai, India. Organized by Schizophrenia Research Foundation (SCARF) and co-sponsored by WPA, WASP, and IPS. Contact [www.iconsoscarf.org](http://www.iconsoscarf.org) (web site).

## SEPTEMBER

**September 10–12**, The International Marcé Society for Perinatal Mental Health Conference, Swansea, Wales. [www.swansea.ac.uk/marce/](http://www.swansea.ac.uk/marce/) (web site).

## OCTOBER

**October 11–12**, 15th Joint Meeting, American Academy of Psychoanalysis and Dynamic Psychiatry (AAPDP) with Organizzazione di Psicoanalisti Italiani Federazione e Registro (OPIFER), Pisa, Italy. Contact: [info@AAPDP.org](mailto:info@AAPDP.org) (e-mail), [www.AAPDP.org](http://www.AAPDP.org) (web site).

**October 30–November 2**, 66th Institute on Psychiatric Services, San Francisco, CA. [www.psychiatry.org/ips](http://www.psychiatry.org/ips) (web site).

## An essential digital companion to the DSM-5®

*NEW! – Now Spanish language supported!*

### DSM-5® Diagnostic Criteria Mobile App

American Psychiatric Association

The **DSM-5® Diagnostic Criteria Mobile App** is designed to help mental health practitioners, researchers and students fully integrate the new DSM criteria and codes into their practice and study. Users have full offline access to all of the criteria sets as well as online access to supporting videos, commentary and resources. Powerful search and customization tools aid and enhance assessment of symptom presentations in a variety of clinical and administrative settings. It features:

- Access to the complete DSM-5® diagnostic criteria sets on your phone and tablet
- Up to date access to ICD-9-CM and ICD-10-CM codes for clinical and administrative use
- Video commentary from the DSM-5 task force members highlighting changes from DSM-IV to DSM-5
- Robust disorder, acronym, code and symptom search functionality
- Bookmarking allows customization of the criteria sets most commonly referenced

Available for both iOS and Android compatible devices through the iTunes store and Google Play.

As the DSM-5® Diagnostic Criteria Mobile App is only available for sale through the iTunes and Android stores, it is not possible for us to extend our traditional APA Member or APA Resident-Fellow Member discounts on the purchase of this product.

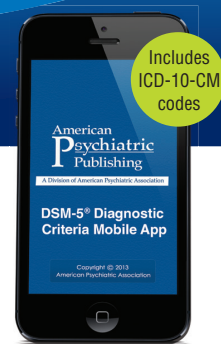

# The Residents' JOURNAL

The Residents' JOURNAL

a publication of  
The American Journal of Psychiatry

March 2014

Volume 9

Issue 3

## Inside

- 2 Disparities in Mental Health  
Ijeoma Chukwu, M.D., M.P.H.
- 3 Difficulties of Recruiting  
Latinos Into Clinical Trials  
Amilcar A. Tirado, M.D., M.B.A.
- 4 LGBT Suicide Prevention  
Must Start in Our Schools  
Neeral Sheth, D.O.
- 5 Overdiagnosis of  
Schizophrenia in African  
Americans  
Kenneth Osiezagha, M.D.  
Sarhani Maitra, M.D.  
Siva Subramanyam  
VaraPrasad Avula, M.D.  
Yetunde Olagbemiro, M.D.
- 8 Spirituality, Guilt, and the  
Therapeutic Relationship  
Elizabeth Stevens, D.O.
- 10 Test Your Knowledge
- 11 Author Information for  
The Residents' Journal  
Submissions and Upcoming  
Themes

## In This Issue

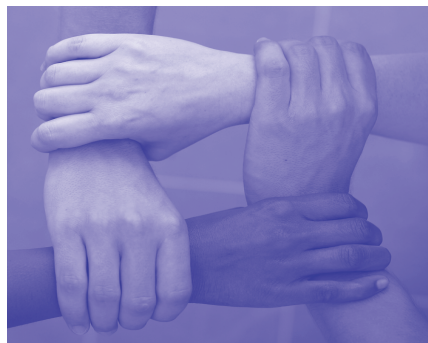

This issue of the *Residents' Journal* focuses on disparities in mental health care. Ijeoma Chukwu, M.D., M.P.H., provides an overview of factors that influence mental health disparities, including attitudes toward mental illness, among racial and ethnic minorities. In a perspective, Amilcar A. Tirado, M.D., M.B.A., discusses the difficulties of recruiting Latinos in clinical research trials. Neeral Sheth, D.O., offers commentary on the high prevalence of suicidality among LGBT youths and roles that schools can play in reducing suicide in this population. Last, Kenneth Osiezagha, M.D., Sarhani Maitra, M.D., Siva Subramanyam VaraPrasad Avula, M.D., and Yetunde Olagbemiro, M.D., present data, including predisposing factors, pertaining to the overdiagnosis of schizophrenia in African Americans.

Editor-in-Chief  
Arshya Vahabzadeh, M.D.  
Deputy Editor  
Misty Richards, M.D., M.S.  
Associate Editor  
David Hsu, M.D.  
Guest Section Editor  
Ijeoma Chukwu, M.D., M.P.H.

Editors Emeriti  
Sarah B. Johnson, M.D.  
Molly McVoy, M.D.  
Joseph M. Cerimele, M.D.  
Sarah M. Fayad, M.D.  
Manita Seawell, M.D.  
Staff Editor  
Angela Moore

## Editor-in-Chief

Arshya Vahabzadeh, M.D.  
(MGH/Harvard)

## Deputy Editor

Misty Richards, M.D., M.S.  
(UCLA)

## Associate Editor

David Hsu, M.D.  
(McLean/Harvard)

*The Residents' Journal* accepts manuscripts authored by medical students, resident physicians, and fellows. To submit your paper, please visit the manuscript submission site at [mc.manuscriptcentral.com/appi-ajp](http://mc.manuscriptcentral.com/appi-ajp) and either create an account or use your existing account. For manuscript type, select "Residents." Then follow the instructions to upload your manuscript. Residents who are interested in participating as Guest Section Editors should e-mail *The Residents' Journal* Editor-in-Chief Arshya Vahabzadeh at [vahab1789@gmail.com](mailto:vahab1789@gmail.com).

*The Residents' Journal* is sent free-of-charge to all psychiatry residents. Anyone interested in being included on the distribution list should contact Angela Moore, *The Residents' Journal* staff editor at [ajp@psych.org](mailto:ajp@psych.org) with "Subscribe to Residents' Journal" in the subject line.

To access the complete Residents' Journal archives, visit [ajp.psychiatryonline.org/residents\\_journal.aspx](http://ajp.psychiatryonline.org/residents_journal.aspx)

# THE AMERICAN JOURNAL OF PSYCHIATRY

## The most widely read psychiatric journal in the world!

*The American Journal of Psychiatry* (AJP) latest Impact Factor is 14.721, a nearly 2 point rise from last year's 12.759 according to the recently released 2012 Journal Citation Reports® (Thomson Reuters, 2013). AJP, a publication of the American Psychiatric Association, ranks second among 135 journals in psychiatry.

- *The American Journal of Psychiatry* is again among the top journals in psychiatry in terms of immediacy according to Thomson Scientific's Immediacy Index. This important performance metric is a good measure of how quickly a given journal's articles are cited—AJP's placement is a result of publishing articles that are relevant, covering current “hot” topics and cutting-edge research, and getting these findings to the field faster with AJP in Advance, the Journal's online-ahead-of-print publication protocol.
- And, as it has for many years, AJP remains far and away the leader among psychiatric publications in total citations. It's 42,730 citation count was almost 5,000 citations above the next publication.
- The editors of *NEJM Journal Watch Psychiatry* announced the 10 top psychiatry stories in 2013, and **SIX** were based on articles published in *The American Journal of Psychiatry*! That the majority of the list's selections came from AJP reflects the journal's commitment to publishing articles that deliver clinically important information to the field.

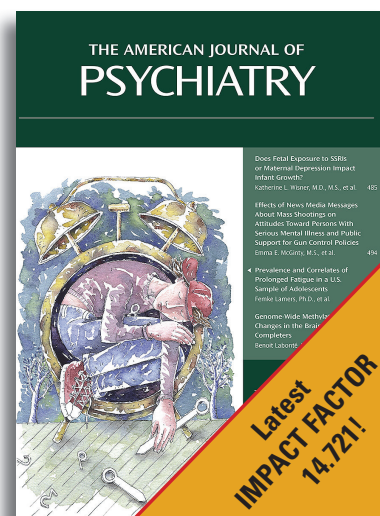

Here are the stories, along with the issue in which the original article appeared:

- Prazosin for PTSD Symptoms and Nightmares in Active-Duty Combat Soldiers (September 2013)
- Varenicline: Fewer Adverse Events Than Previously Thought (December 2013)
- The Question of Ketamine in Treatment-Resistant Depression (October 2013)
- Folate for Treatment-Resistant Depression (December 2012)
- Higher-Dose Citalopram and the FDA Warnings: Not Much to Worry About? (June 2013)
- Do Antipsychotics Hasten Poor Outcomes in Patients with Alzheimer Disease? (September 2013)

ISSN 0002-953X • [ajp.psychiatryonline.org](http://ajp.psychiatryonline.org)

For subscription information email [institutions@psych.org](mailto:institutions@psych.org), or call 703-907-8538

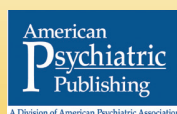

The *First* and *Last* Word in Psychiatry

[www.appi.org](http://www.appi.org) • 1-800-368-5777 • 703-907-7322

## Contents

- A13 **Editorial Board**  
A15 **Highlights of this issue**

### Editorials

- 249 **Does stigma impair prevention of mental disorders?**  
N. Rüsch and G. Thornicroft

- 251 **Embracing autistic traits: Spock's Vulcan heritage in Star Trek – psychiatry in the movies**  
Geoff Lawrence-Smith

- 252 **Is borderline personality disorder a mood disorder?**  
G. Parker

- 254 **Suicide and religion**  
C. C. H. Cook

### Review article

- 256 **Resource-oriented therapeutic models in psychiatry: conceptual review**  
S. Priebe, S. Omer, D. Giacco and M. Slade

### Papers

- 262 **Prospective prediction of suicide in a nationally representative sample: religious service attendance as a protective factor**  
E. M. Kleiman and R. T. Liu

- 267 **Deaths by suicide and their relationship with general and psychiatric hospital discharge: 30-year record linkage study**  
N. Dougall, P. Lambert, M. Maxwell, A. Dawson, R. Sinnott, S. McCafferty, C. Morris, D. Clark and A. Springbett

- 274 **Epidemic of charcoal burning suicide in Japan**  
E. Yoshioka, S. J. B. Hanley, Y. Kawanishi and Y. Saijo

- 282 **On Individual Psychotherapy and the Science of Psychodynamics by David Malan – reflection**  
Peter Fonagy

- 283 **Biological vulnerability to depression: linked structural and functional brain network findings**  
N. L. Nixon, P. F. Liddle, E. Nixon, G. Worwood, M. Liotti and L. Palaniyappan

- 290 **Working memory networks and activation patterns in schizophrenia and bipolar disorder: comparison with healthy controls**  
C. L. Brandt, T. Eichele, I. Melle, K. Sundet, A. Server, I. Agartz, K. Hugdahl, J. Jensen and O. A. Andreassen

- 299 **Transition to schizophrenia in acute and transient psychotic disorders**  
F. Queirazza, D. M. Semple and S. M. Lawrie

- 305 **Jealousy – in 100 words**  
Gillian Rathbone

- 306 **Vitamin–mineral treatment of attention-deficit hyperactivity disorder in adults: double-blind randomised placebo-controlled trial**  
J. J. Rucklidge, C. M. Frampton, B. Gorman and A. Boggis

- 315 **Demonstration – poems by doctors**  
Richard E. Kravitz

- 316 **Evaluating the feasibility of complex interventions in mental health services: standardised measure and reporting guidelines**  
V. J. Bird, C. Le Bouthillier, M. Leamy, J. Williams, S. Bradstreet and M. Slade

### Columns

- 322 **Correspondence**  
324 **Correction**  
325 **Book reviews**  
326 **Contents of *Advances in Psychiatric Treatment***  
327 **Contents of the *American Journal of Psychiatry***  
328 **From the Editor's desk**

### Cover picture

*Untitled* (1996). Gerhard Beck (b. 1951)

After undergoing a Jungian psychoanalysis in 1995, I suddenly started drawing, which might have been the desire to express myself in pictures rather than words. In 1999, I was given a diagnosis of ADHD and Asperger syndrome. I was surprised and shocked at first, but I also felt a sense of relief because I now had an explanation for the many problems I had experienced throughout my life, such as depression, anxiety, loneliness, shyness, poor social skills and a preoccupation with only a narrow range of interests. I was prescribed methylphenidate for my attention problems, but unfortunately this brought about a paranoid psychosis and I had to spend a year in a psychiatric hospital. All my drawings are created spontaneously, the images having their origin in my unconscious.

We are always looking for interesting and visually appealing images for the cover of the *Journal* and would welcome suggestions or pictures, which should be sent to Dr Allan Beveridge, British Journal of Psychiatry, 21 Prescot Street, London E1 8BB, UK or [bjp@rcpsych.ac.uk](mailto:bjp@rcpsych.ac.uk).

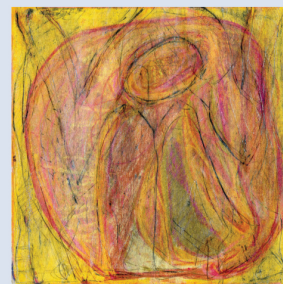

## IN THIS ISSUE

<http://dx.doi.org/10.3969/j.issn.1002-0829.2014.01.001>

## REVIEW

### Recent research about mild cognitive impairment in China

Yan CHENG, Shifu XIAO

<http://dx.doi.org/10.3969/j.issn.1002-0829.2014.01.002>

## ORIGINAL ARTICLES

### Randomized controlled trial of four protocols of repetitive transcranial magnetic stimulation for treating the negative symptoms of schizophrenia

Suhua ZHAO, Jiehua KONG, Shuling LI, Zishun TONG, Chanjuan YANG, Huaqing ZHONG

<http://dx.doi.org/10.3969/j.issn.1002-0829.2014.01.003>

### Cross-sectional survey of the relationship of symptomatology, disability and family burden among patients with schizophrenia in Sichuan, China

Zhuoqiu ZHANG, Hong DENG, Ying CHEN, Shuiying LI, Qian ZHOU, Hua LAI, Lifang LIU, Ling LIU, Wenwu SHEN

<http://dx.doi.org/10.3969/j.issn.1002-0829.2014.01.004>

### Five-year follow-up study of multi-domain cognitive training for healthy elderly community members

Wei FENG, Chunbo LI, You CHEN, Yan CHENG, Wenyan WU

<http://dx.doi.org/10.3969/j.issn.1002-0829.2014.01.005>

### Duration of untreated psychosis and clinical outcomes of first-episode schizophrenia: a 4-year follow-up study

Hongyun QIN, Jie ZHANG, Zhenping WANG, Haiying MIN, Caiying YAN, Fuzhen CHEN, Weizhong FU, Ming ZHANG

<http://dx.doi.org/10.3969/j.issn.1002-0829.2014.01.006>

## FORUM

### Challenges in the diagnosis and treatment of transsexualism in contemporary China

Na LIU, Zheng LU

<http://dx.doi.org/10.3969/j.issn.1002-0829.2014.01.007>

## CASE REPORT

### Case report of refractory tardive dystonia induced by olanzapine

Zhenxiao SUN, Xiangli WANG

<http://dx.doi.org/10.3969/j.issn.1002-0829.2014.01.008>

## BIOSTATISTICS IN PSYCHIATRY (19)

### Establishing a data monitoring committee for clinical trials

Julia Y. LIN, Ying LU

<http://dx.doi.org/10.3969/j.issn.1002-0829.2014.01.009>

## CONFERENCE REPORT

### Report on the Shanghai Conference of the ICD-11 Field Studies Coordinating Group

<http://dx.doi.org/10.3969/j.issn.1002-0829.2014.01.010>

## INSTRUCTIONS TO AUTHORS
