# THE AMERICAN JOURNAL OF PSYCHIATRY

## En este número

A20

### Perspectivas

#### Editoriales

- 479 “Intervenciones psicológicas para la psicosis”: Tema y variaciones  
John S. Strauss
- 482 Una trífida de la neurociencia cognitiva  
Philip D. Harvey
- 485 Nuevos puntos de evidencia serológica de una ruta infecciosa hacia el trastorno bipolar  
Urs Meyer
- 489 Hacia el mapeo de trayectorias alteradas del desarrollo cerebral en la depresión  
Joan L. Luby [Audio](#)

#### Comentario

- 492 El DSM-5 y los criterios del dominio de la investigación: 100 años después de la *Psicopatología General* de Jaspers  
Jose de Leon
- 495 La difusión global de los tratamientos psicológicos: Un derrotero para la investigación y la consulta  
Christopher G. Fairburn y Vikram Patel [Audio](#)

#### Tratamiento en Psiquiatría

- 499 Entrenamiento sobre prácticas alimentarias saludables en adultos mayores que están en riesgo: Un caso de prevención indicada de la depresión  
Sarah T. Stahl, Steven M. Albert, Mary Amanda Dew, Michael H. Lockovich y Charles F. Reynolds III  
[Audio](#) [Guías clínicas](#)

#### Perspectivas en Salud Mental Global

- 506 Depresión en un Hombre Latino en Nueva York  
Renato D. Alarcón, María A. Oquendo, y Milton L. Wainberg [Audio](#)

#### Imágenes en Psiquiatría

- 509 *Ángel de las aguas* (Fuente Bethesda) de Emma Stebbins  
Meredith M. Wortzel

## Resúmenes y Reseñas

- 510 Entrenamiento cognitivo en los trastornos mentales: Actualización y direcciones futuras

Matcheri S. Keshavan, Sophia Vinogradov, Judith Rumsey, Joel Sherrill, y Ann Wagner [Audio](#) [Guías clínicas](#) [Editorial](#)

## Nuevas Investigaciones

### Artículos

- 523 Intervenciones psicológicas para la psicosis: Un meta-análisis de estudios comparativos  
David Trevor Turner, Mark van der Gaag, Eirini Karyotaki, y Pim Cuijpers [Audio](#) [Guías clínicas](#) [EMC](#) [Editorial](#)
- 539 Activación cerebral alterada durante la imitación y la observación de acciones en esquizofrenia: Un enfoque translacional de la investigación sobre la disfunción social en esquizofrenia  
Katharine N. Thakkar, Joel S. Peterman, y Sohee Park [Editorial](#)
- 549 La actividad intrínseca en el hipocampo como un biomarcador de cognición y los síntomas en la esquizofrenia  
Jason R. Tregellas, Jason Smucny, Josette G. Harris, Ann Olincy, Keeran Maharajh, Eugene Kronberg, Lindsay C. Eichman, Emma Lyons, y Robert Freedman [Editorial](#)
- 557 Documentación serológica de la exposición materna a la influenza y trastorno bipolar en hijos adultos  
Sarah E. Canetta, Yuanyuan Bao, Mary Dawn T. Co, Francis A. Ennis, John Cruz, Masanori Terajima, Ling Shen, Cristoph Kellendonk, Catherine A. Schaefer, y Alan S. Brown [EMC](#) [Editorial](#)
- 564 Desarrollo estructural del cerebro y comienzo de la depresión durante la adolescencia: Un estudio prospectivo longitudinal  
Sarah Whittle, Renee Lichter, Meg Dennison, Nandita Vijayakumar, Orli Schwartz, Michelle L. Byrne, Julian G. Simmons, Murat Yücel, Christos Pantelis, Patrick McGorry, y Nicholas B. Allen  
[Audio](#) [EMC](#) [Editorial](#)
- 572 Síntomas neuropsiquiátricos basales y el riesgo de incidente deterioro cognitivo leve: Un estudio basado en la población  
Yonas E. Geda, Rosebud O. Roberts, Michelle M. Mielke, David S. Knopman, Teresa J.H. Christianson, Vernon S. Pankratz, Bradley F. Boeve, Ondřej Sochor, Eric G. Tangalos, Ronald C. Petersen, y Walter A. Rocca [Audio](#) [Guías clínicas](#)

## Comunicados y Actualizaciones

### Cartas al Editor

- 582** Riesgo de hemorragia gastrointestinal alta al tomar ISRS con AINES o aspirina  
Psicoterapia psicoanalítica o terapia cognitivo-conductual para la bulimia nerviosa  
Asesoramiento genético para los trastornos psiquiátricos comunes: Una oportunidad de colaboración interdisciplinar
- 585** Corrección

### Reseñas Bibliográficas

- 586** DSM-5 Clinical Cases [Casos clínicos del DSM-5]  
Guía de consulta de los criterios diagnósticos del DSM-5  
Pocket Guide to DSM-5 Diagnostic Exam [Guía de bolsillo del examen de diagnóstico del DSM-5]  
DSM-5 Handbook of Differential Diagnosis [Manual de diagnóstico diferencial del DSM-5]
- 591** Libros Recibidos

## Otros Temas de Interés

- 592** Actos Oficiales: Gestión de riesgos y temas en los modelos de atención integrados
- 593** Educación Médica Continuada
- A6** Directivos de la American Psychiatric Association
- A8** Calendario
- A18** Contenidos del *British Journal of Psychiatry*
- A19** Contenidos del *Shanghai Archives of Psychiatry*

### Audio

artículo en AJP Audio: archivo .mp3 descargable de [ajp.psychiatryonline.org](http://ajp.psychiatryonline.org)

### Guías clínicas

este artículo ofrece guías clínicas (ver página "En este Número" o al final del artículo)

### EMC

existe un curso en línea que cubre los contenidos de este artículo para los suscriptores del programa de cursos de EMC del AJP

### Editorial

este artículo se discute en uno de los editoriales de este número

La Tabla de Contenidos de Este Número Está Disponible en Español

*(This issue's Table of Contents is available in Spanish)*

Presented in collaboration with the Office of Global Health, UMDNJ-Robert Wood Johnson Medical School

Translation courtesy of

Sergi Casals, M.A.

*Garuna, Medellin, Colombia (www.garunaeditors.com)*

Carlos Lopez Jaramillo, M.D.

*Universidad de Antioquia, Medellin, Colombia*

Javier I. Escobar, M.D., M.Sc.

*UMDNJ-Robert Wood Johnson Medical School*

Consulte *The American Journal of Psychiatry* en línea en [ajp.psychiatryonline.org](http://ajp.psychiatryonline.org)

**NEW**

Also Included: Translations of selected abstracts!

*(Support for this effort provided by AstraZeneca-Colombia.)*

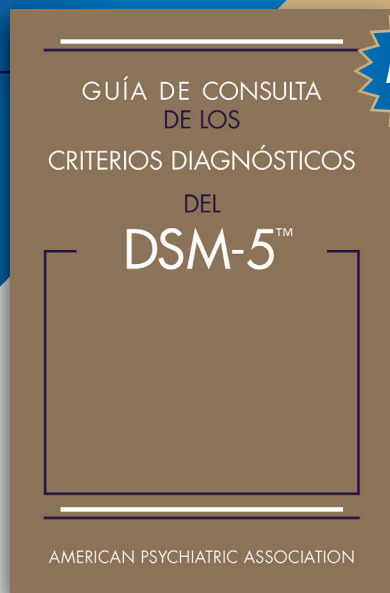

**Nuevo!**

## Guía de consulta de los criterios diagnósticos del DSM-5™

**Spanish Edition of the Desk Reference to the Diagnostic Criteria From DSM-5™**

American Psychiatric Association

La Guía de consulta de los criterios diagnósticos del DSM-5™ es una ayuda concisa y asequible para la referencia psiquiátrica fundamental, el DSM-5™. Incluye la clasificación diagnóstica completa revisada, así como todos los criterios diagnósticos del DSM-5™ en un formato fácil de utilizar. Esta cómoda referencia proporciona un acceso rápido a la información esencial para emitir un diagnóstico. Diseñado como complemento del DSM-5™, esta cómoda guía ayudará a los profesionales de la salud mental a incorporar los criterios diagnósticos del DSM-5™ en sus diagnósticos.

El Manual diagnóstico y estadístico de los trastornos mentales es la máxima referencia autorizada para la práctica clínica en el campo de la salud mental. Los cambios estructurales y diagnósticos de la quinta edición son un material que todos los clínicos "deben conocer". La Guía de consulta de los criterios diagnósticos del DSM-5™ condensa la información diagnóstica actualizada esencial de este manual para ofrecer a los clínicos un recurso inestimable para diagnosticar con eficacia los trastornos mentales, desde el de mayor prevalencia al menos frecuente.

2014 • 490 pages • ISBN 978-0-89042-551-0 • Paperback • \$69.00 • Item #2551

*También disponible en Español*

### Aplicación para celular de los Criterios Diagnósticos del DSM-5™

La Aplicación Móvil de Criterios Diagnósticos DSM-5™ proporciona a los profesionales, investigadores y estudiantes de la salud mental un rápido acceso a códigos y criterios vitales de DSM para que puedan integrar por completo los nuevos datos en su práctica y sus estudios. Los usuarios tienen acceso completo fuera de línea a todos los conjuntos de criterios, además de acceso en línea a vídeos, comentarios y recursos de apoyo. Sus poderosas herramientas de personalización y de búsqueda ayudan y mejoran la valoración de las presentaciones de los síntomas en diversos entornos clínicos y administrativos.

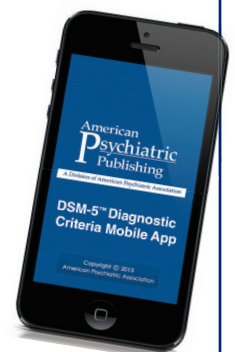

Ahora disponible para dispositivos iOS y Android.

### Entrenamiento cognitivo en los trastornos mentales: Actualización y direcciones futuras

Matcheri S. Keshavan, M.D.  
Sophia Vinogradov, M.D.  
Judith Rumsey, Ph.D.  
Joel Sherrill, Ph.D.  
Ann Wagner, Ph.D.

**Objetivo:** Este artículo ofrece una revisión de la base conceptual, las definiciones y la evolución de los enfoques de entrenamiento cognitivo para el tratamiento de los trastornos mentales.

**Método:** Los autores revisan el estado del arte del entrenamiento cognitivo en enfermedades psiquiátricas y sus objetivos neurales y comportamentales, y resumen los factores que parecen estar relacionados con una respuesta efectiva, incluyendo las características del aprendiz que influyen sobre el re-

sultado clínico. También discuten aspectos metodológicos importantes para el desarrollo y la evaluación de los enfoques de entrenamiento cognitivo, con el objetivo de crear enfoques de tratamiento que sean eficientes y efectivos al máximo. Finalmente, identifican vacíos en el conocimiento existente y trazan direcciones de investigación clave para el futuro.

**Resultados:** Aunque gran parte de la investigación inicial se ha llevado a cabo en esquizofrenia, recientemente se ha aplicado el entrenamiento cognitivo a una gama cada vez más amplia de enfermedades neuropsiquiátricas, que incluyen el trastorno por déficit de atención e hiperactividad, los trastornos del ánimo y los trastornos por uso de sustancias. El entrenamiento cognitivo

se aprovecha de las capacidades neuroplásticas del cerebro y tiene como objetivo la función del sistema neural en los trastornos psiquiátricos, y mejora así los procesos cognitivos que intervienen en la regulación de las emociones, los síntomas clínicos y el funcionamiento adaptable a la comunidad.

**Conclusiones:** El entrenamiento cognitivo es una vía promisoriosa, especialmente teniendo en cuenta la limitada eficacia de las intervenciones farmacológicas para la mejora de los déficits cognitivos. Sin embargo, es necesaria más investigación para entender los mecanismos subyacentes al entrenamiento cognitivo, los predictores de respuesta, generalización y aplicabilidad en el mundo real, y los enfoques para difundirlo en los contextos de consulta.

*(Am J Psychiatry 2014; 171:510–522)*

## Artículos

### Intervenciones psicológicas para la psicosis: Un meta-análisis de estudios comparativos

David Trevor Turner, M.Sc., M.Sc.Res.  
Mark van der Gaag, Ph.D.  
Eirini Karyotaki, M.Sc.Res.  
Pim Cuijpers, Ph.D.

**Objetivo:** Los meta-análisis han demostrado la eficacia de varias intervenciones para la psicosis, y un número reducido de estudios han comparado esas intervenciones. El objetivo de este estudio fue proporcionar más conocimiento de la relativa eficacia de las intervenciones psicológicas para la psicosis.

**Método:** Se identificaron 48 ensayos con resultados en los que se comparaban intervenciones psicológicas para la psicosis. Las comparaciones incluían 3.295 participantes. Como resultado de la categorización de las intervenciones, seis intervenciones fueron comparadas

con otras de las intervenciones agrupadas. Se calculó la *g* de Hedges para todas las comparaciones. Se evaluó el riesgo de sesgo con cuatro ítems de la herramienta de riesgo de sesgo de Cochrane, y se realizaron análisis de sensibilidad. Se evaluó la fidelidad del investigador y se realizaron análisis de sensibilidad para los hallazgos significativos robustos.

**Resultados:** La terapia cognitivo-conductual (TCC) fue significativamente más eficaz que las otras intervenciones en conjunto para reducir los síntomas positivos ( $g=0,16$ ). Este hallazgo fue robusto en todos los análisis de sensibilidad para el riesgo de sesgo, pero perdió significancia en los análisis de sensibilidad para la fidelidad del investigador, que presentó baja potencia. El entrenamiento en habilidades sociales fue significativamente más eficaz para

reducir los síntomas negativos ( $g=0,27$ ). Este hallazgo fue robusto en los análisis de sensibilidad tanto para el riesgo de sesgo como para la fidelidad del investigador. Los hallazgos significativos para la TCC, el entrenamiento en habilidades sociales y la remediación cognitiva para los síntomas generales no resultaron ser robustos después de los análisis de sensibilidad. La TCC fue significativamente más eficaz cuando se comparó directamente con el hecho de entablar amistad para los síntomas generales ( $g=0,42$ ) y con el asesoramiento de apoyo para los síntomas positivos ( $g=0,23$ ).

**Conclusiones:** Existen diferencias pequeñas pero confiables en cuanto a la eficacia, entre las intervenciones psicológicas para la psicosis, y ocurren en un patrón consistente con los factores específicos de intervenciones particulares.

*(Am J Psychiatry 2014; 171:523–538)*

## Activación cerebral alterada durante la imitación y la observación de acciones en esquizofrenia: Un enfoque translacional de la investigación sobre la disfunción social en esquizofrenia

Katharine N. Thakkar, Ph.D.  
Joel S. Peterman, M.A.  
Sohee Park, Ph.D.

**Objetivo:** Las discapacidades sociales son un rasgo esencial de la esquizofrenia, pero se sabe poco sobre los mecanismos subyacentes. La imitación, un proceso a través del cual entendemos la mente de los demás, involucra el llamado sistema de las neuronas espejo, una red que comprende el lóbulo parietal inferior, el giro cerebral frontal inferior, y el surco temporal superior posterior. Los autores examinaron la función del sistema de neuronas espejo en la esquizofrenia.

**Método:** Dieciséis pacientes con esquizofrenia medicados y 16 sujetos sanos de comparación realizaron una tarea de imitación/observación de una

acción durante una resonancia magnética funcional. Los participantes vieron un vídeo de una mano que se movía o de un señalamiento espacial y recibieron la instrucción o bien de hacer movimientos similares a los del estímulo con los dedos, o bien de simplemente observar. Se midió la activación en el sistema de neuronas espejo durante las acciones imitativas en comparación con las no imitativas y durante la observación de una mano que se movía versus un señalamiento espacial en movimiento. Estos contrastes se compararon entre los grupos.

**Resultados:** La activación en el sistema de neuronas espejo fue menos significativa para la imitación en esquizofrenia. En comparación con los sujetos sanos, durante la imitación los pacientes tuvieron menor actividad en el surco temporal superior posterior, y mayor ac-

tividad en el surco temporal superior posterior y en el lóbulo parietal durante la acción no imitativa. Los pacientes también mostraron menor actividad en estas regiones durante la observación de acciones. La activación del sistema de neuronas espejo estuvo relacionada con la severidad de los síntomas y el funcionamiento social en los pacientes, y con el síndrome esquizoide en los sujetos de comparación.

**Conclusiones:** Dado el rol del lóbulo parietal inferior y del surco temporal superior posterior en la imitación y la cognición social, la habilidad imitativa deteriorada en esquizofrenia puede tener su origen en la percepción incorrecta del movimiento biológico y en las transformaciones defectuosas de percepción a acción. Estos hallazgos amplían nuestro conocimiento de la disfunción social en esquizofrenia.

(*Am J Psychiatry* 2014; 171:539–548)

## La actividad intrínseca en el hipocampo como un biomarcador de cognición y los síntomas en esquizofrenia

Jason R. Tregellas, Ph.D.  
Jason Smucny, M.S.  
Josette G. Harris, Ph.D.  
Ann Olincy, M.D.  
Keeran Maharajh, Ph.D.  
Eugene Kronberg, Ph.D.  
Lindsay C. Eichman, B.S.  
Emma Lyons, B.S.  
Robert Freedman, M.D.

**Objetivo:** La identificación de biomarcadores de la disfunción cognitiva en esquizofrenia es una prioridad para la investigación en psiquiatría. Los estudios de neuroimágenes funcionales sugieren que la hiperactividad intrínseca en el hipocampo en “estado de reposo” es un rasgo característico de la esquizofrenia. Sin embargo, se han explorado muy poco las relaciones entre este fenotipo y los síntomas de la enfermedad. Los

autores examinaron la actividad del hipocampo en reposo en pacientes con esquizofrenia y en sujetos sanos de comparación y analizaron la relación entre la actividad intrínseca en el hipocampo y la función cognitiva en los pacientes, midiéndola con la Batería Cognitiva de Consenso MATRICS (MCCB).

**Método:** Se tomaron neuroimágenes funcionales con un escáner 3T MR a 28 pacientes con esquizofrenia y a 28 sujetos sanos de comparación de las mismas edades, todos en “estado de reposo”. La actividad en el hipocampo se extrajo por medio de análisis de componentes independientes de grupo. Se emplearon análisis de correlaciones para examinar la relación entre la actividad en el hipocampo y los puntajes compuestos y por áreas obtenidos en los pacientes con la batería MCCB, y también entre la actividad en el hipocampo y los síntomas positivos y negativos.

**Resultados:** Se observó mayor actividad del hipocampo derecho en reposo en los pacientes en comparación con los sujetos sanos. En los pacientes se observó una correlación negativa significativa entre la actividad en el hipocampo derecho y los puntajes-T compuestos en la MCCB. La correlación se hizo siguiendo las áreas de la MCCB de atención/vigilancia, memoria de trabajo y aprendizaje visual. La actividad en el hipocampo se correlacionó positivamente con los síntomas negativos. Los puntajes en la MCCB estuvieron inversamente correlacionados con los síntomas negativos.

**Conclusiones:** Estos hallazgos sugieren que una mayor actividad intrínseca en el hipocampo es un rasgo característico de la esquizofrenia que se asocia mayormente con la disfunción cognitiva, y apoyan que la actividad en el hipocampo es un biomarcador candidato para el desarrollo terapéutico.

(*Am J Psychiatry* 2014; 171:549–556)

## Documentación serológica de la exposición materna a la influenza y trastorno bipolar en hijos adultos

Sarah E. Canetta, Ph.D.  
 Yuanyuan Bao, M.S.  
 Mary Dawn T. Co, M.D.  
 Francis A. Ennis, M.D.  
 John Cruz, B.S.  
 Masanori Terajima, M.D., Ph.D.  
 Ling Shen, Ph.D.  
 Christoph Kellendonk, Ph.D.  
 Catherine A. Schaefer, Ph.D.  
 Alan S. Brown, M.D., M.P.H.

**Objetivo:** Los autores examinaron si la exposición materna confirmada serológicamente a la influenza estaba asociada a un mayor riesgo de trastorno bipolar en los hijos y a subtipos

del trastorno bipolar, con y sin rasgos psicóticos.

**Método:** El estudio utilizó un diseño anidado de casos y controles en la cohorte de nacimiento del Estudio de Salud y Desarrollo Infantil (Child Health and Development Study). En total, se identificaron 85 personas con trastorno bipolar después de verificación y evaluación diagnóstica extensiva, y en el análisis se aparearon con 170 sujetos de comparación. Para determinar la documentación serológica de exposición materna a la influenza se utilizó el test de inhibición de la hemaglutinación.

**Resultados:** No se observó ninguna asociación entre la documentación se-

rológica de la exposición materna a la influenza y el trastorno bipolar en los hijos. Sin embargo, se relacionó la exposición materna serológica a la influenza con un riesgo cinco veces mayor de trastorno bipolar con rasgos psicóticos.

**Conclusiones:** Los resultados sugieren que la exposición materna a la influenza puede aumentar el riesgo de los hijos de desarrollar trastorno bipolar con rasgos psicóticos. Al considerar estos hallazgos juntamente con asociaciones anteriores entre la esquizofrenia y la exposición prenatal a la influenza, pueden sugerir que la influenza prenatal es un factor de riesgo de psicosis más que de diagnóstico de un trastorno psicótico específico.

(*Am J Psychiatry* 2014; 171:557–563)

## Desarrollo estructural del cerebro y comienzo de la depresión durante la adolescencia: Un estudio prospectivo longitudinal

Sarah Whittle, Ph.D.  
 Renee Lichter, Ph.D.  
 Meg Dennison, Ph.D.  
 Nandita Vijayakumar, B.Sc.  
 Orli Schwartz, Ph.D.  
 Michelle L. Byrne, Ph.D.  
 Julian G. Simmons, Ph.D.  
 Murat Yücel, Ph.D.  
 Christos Pantelis, M.D., M.R.C.Psych.  
 Patrick McGorry, M.D., Ph.D.  
 Nicholas B. Allen, Ph.D.

**Objetivo:** Los autores quisieron investigar si el desarrollo estructural de las regiones límbica, estriada y prefrontal, que están implicadas de manera crítica en la fisiopatología de la depresión, está asociado con el comienzo de la depresión en la adolescencia.

**Método:** En un diseño longitudinal, una muestra de la comunidad de 86 ado-

lescentes con riesgo (41 de los cuales eran mujeres) que no tenían historial de trastornos depresivos, participaron en evaluaciones de neuroimágenes que se llevaron a cabo en la adolescencia temprana (12 años) y en la adolescencia media (16 años). Se evaluó el inicio de los trastornos depresivos en el período entre la adolescencia temprana y la tardía (de 12 a 18 años). Treinta participantes experimentaron el primer episodio de un trastorno depresivo durante el periodo de seguimiento. Los autores evaluaron si el comienzo del trastorno depresivo estaba asociado con el cambio estructural en las regiones corticales límbica, estriada y prefrontal, entre la adolescencia temprana y la adolescencia media.

**Resultados:** El cambio volumétrico en el hipocampo, la amígdala y el putamen entre la adolescencia temprana y la adolescencia media se asoció con el inicio de la depresión durante la adolescencia.

El crecimiento atenuado del hipocampo y la reducción atenuada del volumen del putamen a lo largo del tiempo se asociaron con el inicio de la depresión. El género moderó la asociación entre el crecimiento de la amígdala y la depresión de manera que el crecimiento exagerado y el crecimiento atenuado de la amígdala se asociaron con la depresión en mujeres y en hombres respectivamente. En el tiempo, el menor volumen del núcleo accumbens se asoció con la depresión en mujeres solamente.

**Conclusiones:** Estos hallazgos sugieren que las alteraciones en las trayectorias de desarrollo de las regiones límbica y estriada durante la adolescencia pueden representar una manifestación neurobiológica de un factor de riesgo del desarrollo de la depresión durante este período crítico. De este modo, pueden ofrecer indicaciones sobre mecanismos etiológicos de este trastorno.

(*Am J Psychiatry* 2014; 171:564–571)

## Síntomas neuropsiquiátricos basales y el riesgo de incidente deterioro cognitivo leve: Un estudio basado en la población

Yonas E. Geda, M.D., M.Sc.  
 Rosebud O. Roberts, M.B., Ch.B.  
 Michelle M. Mielke, Ph.D.  
 David S. Knopman, M.D.  
 Teresa J.H. Christianson, B.Sc.  
 Vernon S. Pankratz, Ph.D.  
 Bradley F. Boeve, M.D.  
 Ondřej Sochor, M.D.  
 Eric G. Tangalos, M.D.  
 Ronald C. Petersen, M.D., Ph.D.  
 Walter A. Rocca, M.D., M.P.H.

**Objetivo:** Los autores realizaron un estudio de cohorte prospectivo para estimar el riesgo de incidente deterioro cognitivo leve en adultos mayores (70 años) cognitivamente normales, con o sin síntomas neuropsiquiátricos basales. La investigación se llevó a cabo en el contexto del estudio de envejecimiento de la Clínica Mayo, basado en la población.

**Método:** Un panel de consenso de expertos adjudicó una clasificación de

envejecimiento cognitivo normal, deterioro cognitivo leve y demencia, con base en los criterios publicados. Se calcularon los cocientes de riesgo (hazard ratios) y los intervalos de confianza del 95% utilizando el modelo de riesgos proporcionales de Cox y considerando la edad como una escala de tiempo. Se contó con los datos basales del Cuestionario del Inventario Neuropsiquiátrico de 1.587 personas cognitivamente normales que tuvieron como mínimo una visita de seguimiento.

**Resultados:** A la cohorte se le hizo seguimiento del incidente deterioro cognitivo leve (N=365) o de las variables de censura (N=179) por una media de 5 años. La agitación (coeficiente de riesgo (CR)=3,06; IC 95%=1,89-4,93), la apatía (CR=2,26; IC 95%=1,49-3,41), la ansiedad (CR=1,87; IC 95%=1,28-2,73), la irritabilidad (CR=1,84; IC 95%=1,31-2,58) y la depresión (CR=1,63; IC 95%=1,23-2,16), observadas inicialmente, aumentaron el riesgo para un posterior deterioro cognitivo leve incidente. Las ideas

delirantes y las alucinaciones no lo aumentaron. Un análisis secundario, de significancia limitada por el reducido número de participantes en el estudio, demostró que la euforia, la desinhibición y los comportamientos nocturnos eran predictores significativos del deterioro cognitivo leve no amnésico, pero no del deterioro cognitivo leve amnésico. En contraste, la depresión predijo el deterioro cognitivo leve amnésico (CR=1,74; IC 95%=1,22-2,47) pero no el deterioro cognitivo leve no amnésico.

**Conclusiones:** Se observó una mayor incidencia del incidente deterioro cognitivo leve en adultos mayores en residencias comunitarias que tuvieran síntomas psiquiátricos no psicóticos en el momento inicial. Estos síntomas psiquiátricos basales eran de una magnitud similar o mayor que los biomarcadores (imágenes de resonancias magnéticas estructurales y genéticas) para aumentar el riesgo de incidente deterioro cognitivo leve.

(*Am J Psychiatry* 2014; 171:572-581)
